# Supplementary material
Source: PubMed Central journal article supplement (PMC2614630)
Supplement: blood-2008-05-158048_2.pdf [file blood-2008-05-158048_2.pdf]

| <b>Human Gene</b> | <b>GenBank No.</b> | <b>Forward Primer</b>   | <b>Reverse Primer</b>   |
|-------------------|--------------------|-------------------------|-------------------------|
| SR-A              | NM_138715          | GCAGTGGGATCACTTTCACAA   | AGCTGTCATTGAGCGAGCATC   |
| VLDL-R            | NM_003383          | GGTGAAAATGATTGTGACAGTGG | GTGAACTCGTCGGGACTACA    |
| 18 S              | BU074932           | ATCCATTGGAGGGCAAGTCT    | CGCTCCCAAGATCCAACACTAC  |
| GAPDH             | M32599             | CGTGCCGCCTGGAGAAACC     | TGGAAGAGTGGGAGTTGCTGTTG |
| Axl               | NM_001699          | GTGGGCAACCCAGGGAATATC   | GTACTGTCCCCTGTCGGAAAG   |
| Tyro3             | NM_006293          | CAGCCGGTGAAGCTCAACT     | TGGCACACCTTCTACCGTGA    |
| Mer               | NM_006343          | ACCTCTGTCTGAATCAAAGCCC  | GCACACTGGTTATGCTGAAGGA  |
